# Supplementary material for: A π-extended triphenylamine based dopant-free hole-transporting material for perovskite solar cells via heteroatom substitution
Source: Royal Society of Chemistry journal article supplement (doi:10.1039/d1cp05503h), 2022-01-01
Supplement: d1cp05503h1.pdf [file d1cp05503h1.pdf]

*Electronic Supplementary Information*

A  $\pi$ -Extended Triphenylamine Based dopant-free Hole-Transporting Material for Perovskite Solar Cells *via* Heteroatom Substitution

*Mengyao Hao*<sup>a</sup>, *Davin Tan*<sup>b</sup>, *Weijie Chi*<sup>,b,c\*</sup>, *Zesheng Li*<sup>a\*</sup>

<sup>a</sup> Key Laboratory of Cluster Science of Ministry of Education, Beijing Key Laboratory of Photoelectronic/Electrophotonic Conversion Materials, School of Chemistry and Chemical Engineering, Beijing Institute of Technology, Beijing 100081, China

<sup>b</sup> Fluorescence Research Group, Singapore University of Technology and Design, 8 Somapah Road, 487372 Singapore

<sup>c</sup> Department of Chemistry, School of Science, Hainan University, Haikou, 570228, China.

Corresponding authors

E-mail: [weijie\\_chi@hainanu.edu.cn](mailto:weijie_chi@hainanu.edu.cn)

E-mail: [zeshengli@bit.edu.cn](mailto:zeshengli@bit.edu.cn)

## Contents

|                                                                                                                                                                                                                                                                                                                                                                                                                          |          |
|--------------------------------------------------------------------------------------------------------------------------------------------------------------------------------------------------------------------------------------------------------------------------------------------------------------------------------------------------------------------------------------------------------------------------|----------|
| <b>Computational details.....</b>                                                                                                                                                                                                                                                                                                                                                                                        | <b>1</b> |
| <b>Tables</b>                                                                                                                                                                                                                                                                                                                                                                                                            |          |
| <b>Table S1</b> Calculated transition energy $E_{0-0}$ (eV), maximum wavelengths $\lambda_{ab}$ (nm), oscillator strength $f$ of absorption, Transition (HOMO→LUMO) and the contribution of heteroatoms to the hole for the first excited state, transition energy $E_1$ (eV), maximum wavelengths $\lambda_{em}$ (nm) of emission and Stokes shifts (nm).....                                                           | 3        |
| <b>Table S2</b> Specific data for crystal structure analysis, including Space group, Cell volume (cm <sup>3</sup> ), Density (g/cm <sup>3</sup> ), Total energy (eV), Van der Waals energy (eV), Length a (Å), b (Å), c (Å).....                                                                                                                                                                                         | 4        |
| <b>Table S3</b> The transfer integrals $V_{DA}$ (eV), hole-hopping rate $k_h$ (s <sup>-1</sup> ), centroid-to-centroid distances $r$ (cm), the hole mobility $\mu_h$ (cm <sup>2</sup> v <sup>-1</sup> s <sup>-1</sup> ) for main hopping pathways selected and the total hole mobility $\mu$ (cm <sup>2</sup> v <sup>-1</sup> s <sup>-1</sup> ) based on the predicted crystalline structures of <b>OMeTPA-TPA</b> ..... | 5        |
| <b>Table S4</b> The transfer integrals $V_{DA}$ (eV), hole-hopping rate $k_h$ (s <sup>-1</sup> ), centroid-to-centroid distances $r$ (cm), the hole mobility $\mu_h$ (cm <sup>2</sup> v <sup>-1</sup> s <sup>-1</sup> ) for main hopping pathways selected and the total hole mobility $\mu$ (cm <sup>2</sup> v <sup>-1</sup> s <sup>-1</sup> ) based on the predicted crystalline structures of <b>OMeTPA-B</b> .....   | 6        |
| <b>Table S5</b> The transfer integrals $V_{DA}$ (eV), hole-hopping rate $k_h$ (s <sup>-1</sup> ), centroid-to-centroid distances $r$ (cm), the hole mobility $\mu_h$ (cm <sup>2</sup> v <sup>-1</sup> s <sup>-1</sup> ) for main hopping pathways selected and the total hole mobility $\mu$ (cm <sup>2</sup> v <sup>-1</sup> s <sup>-1</sup> ) based on the predicted crystalline structures of <b>OMeTPA-C</b> .....   | 7        |
| <b>Table S6</b> The transfer integrals $V_{DA}$ (eV), hole-hopping rate $k_h$ (s <sup>-1</sup> ), centroid-to-centroid distances $r$ (cm), the hole mobility $\mu_h$ (cm <sup>2</sup> v <sup>-1</sup> s <sup>-1</sup> ) for main hopping pathways selected and the total hole mobility $\mu$ (cm <sup>2</sup> v <sup>-1</sup> s <sup>-1</sup> ) based on the predicted crystalline structures of <b>OMeTPA-Si</b> .....  | 8        |
| <b>Table S7</b> The transfer integrals $V_{DA}$ (eV), hole-hopping rate $k_h$ (s <sup>-1</sup> ), centroid-to-centroid distances $r$ (cm), the hole mobility $\mu_h$ (cm <sup>2</sup> v <sup>-1</sup> s <sup>-1</sup> ) for main hopping pathways selected and the total hole mobility $\mu$ (cm <sup>2</sup> v <sup>-1</sup> s <sup>-1</sup> ) based on the predicted crystalline structures of <b>OMeTPA-</b>          |          |

|                                                                                                                                                                                                                                                                                                                                                                |    |
|----------------------------------------------------------------------------------------------------------------------------------------------------------------------------------------------------------------------------------------------------------------------------------------------------------------------------------------------------------------|----|
| <b>Ge</b> .....                                                                                                                                                                                                                                                                                                                                                | 9  |
| <b>Table S8</b> The transfer integrals $V_{DA}$ (eV), hole-hopping rate $k_h$ ( $s^{-1}$ ), centroid-to-centroid distances $r$ (cm), the hole mobility $\mu_h$ ( $cm^2 v^{-1} s^{-1}$ ) for main hopping pathways selected and the total hole mobility $\mu$ ( $cm^2 v^{-1} s^{-1}$ ) based on the predicted crystalline structures of <b>OMeTPA-N</b> .....   | 10 |
| <b>Table S9</b> The transfer integrals $V_{DA}$ (eV), hole-hopping rate $k_h$ ( $s^{-1}$ ), centroid-to-centroid distances $r$ (cm), the hole mobility $\mu_h$ ( $cm^2 v^{-1} s^{-1}$ ) for main hopping pathways selected and the total hole mobility $\mu$ ( $cm^2 v^{-1} s^{-1}$ ) based on the predicted crystalline structures of <b>OMeTPA-P</b> .....   | 11 |
| <b>Table S10</b> The transfer integrals $V_{DA}$ (eV), hole-hopping rate $k_h$ ( $s^{-1}$ ), centroid-to-centroid distances $r$ (cm), the hole mobility $\mu_h$ ( $cm^2 v^{-1} s^{-1}$ ) for main hopping pathways selected and the total hole mobility $\mu$ ( $cm^2 v^{-1} s^{-1}$ ) based on the predicted crystalline structures of <b>OMeTPA-As</b> ..... | 12 |
| <b>Table S11</b> The transfer integrals $V_{DA}$ (eV), hole-hopping rate $k_h$ ( $s^{-1}$ ), centroid-to-centroid distances $r$ (cm), the hole mobility $\mu_h$ ( $cm^2 v^{-1} s^{-1}$ ) for main hopping pathways selected and the total hole mobility $\mu$ ( $cm^2 v^{-1} s^{-1}$ ) based on the predicted crystalline structures of <b>OMeTPA-O</b> .....  | 13 |
| <b>Table S12</b> The transfer integrals $V_{DA}$ (eV), hole-hopping rate $k_h$ ( $s^{-1}$ ), centroid-to-centroid distances $r$ (cm), the hole mobility $\mu_h$ ( $cm^2 v^{-1} s^{-1}$ ) for main hopping pathways selected and the total hole mobility $\mu$ ( $cm^2 v^{-1} s^{-1}$ ) based on the predicted crystalline structures of <b>OMeTPA-S</b> .....  | 14 |
| <b>Table S13</b> The transfer integrals $V_{DA}$ (eV), hole-hopping rate $k_h$ ( $s^{-1}$ ), centroid-to-centroid distances $r$ (cm), the hole mobility $\mu_h$ ( $cm^2 v^{-1} s^{-1}$ ) for main hopping pathways selected and the total hole mobility $\mu$ ( $cm^2 v^{-1} s^{-1}$ ) based on the predicted crystalline structures of <b>OMeTPA-Se</b> ..... | 15 |
| <b>Table S14</b> The combination modes and surface adsorption energy (eV) of central core and perovskite surface (001 face). ....                                                                                                                                                                                                                              | 16 |
| <b>Table S15</b> The optimized structures of Pb-N and Pb-X models of central core and perovskite surface (001 face). ....                                                                                                                                                                                                                                      | 17 |

**Table S16** The Pb-N (Pb-X) bond lengths ( $\text{\AA}$ ) of the most stable combination mode of central core and perovskite surface (Corresponding to the structure in Figure S5). ..... 18

**Figures**

**Figure S1** The chemical structures and full names of the study molecules..... 19

**Figure S2** Molecular electrostatic potentials (*ESP*) of **R-TPA** and **R-X**, along with the Max positive *ESP*, Max negative *ESP*, and the difference between positive and negative *ESP* of the investigated molecules, the unit is  $\text{kcal mol}^{-1}$ . ..... 20

**Figure S3** Calculated absorption spectra of the study molecules. .... 21

**Figure S4** The main neighboring hole-hopping pathways selected based on the predicted crystal structures for all molecules, along with The reorganization energy  $k_h$  ( $\text{s}^{-1}$ , green one), centroid-to-centroid distances  $r$  (cm, blue one), transfer integrals  $V$  (eV, orange one) and the hole mobility  $\mu_h$  ( $\text{cm}^2 \text{v}^{-1} \text{s}^{-1}$ , purple one) for main hopping pathways selected based on the predicted crystalline structures. .... 22

**Figure S5** The combination mode of central core and perovskite surface (001 face)..... 23

**Figure S6** The most stable combination mode of central core and perovskite surface (001 face) ..... 24

**Figure S7** The distance of perovskite/**R-TPA** and perovskite/**R-Se** systems..... 25

**Figure S8** The distribution of partial atomic charges for **R-B**, **R-C**, **R-Si**, **R-Ge**, **R-N**, **R-P**, **R-As**, **R-O**, and **R-S**, where blue represents negative charge and pink represents positive charge..... 26

**References**..... 27

## Computational details

### Hole transport properties for isolated molecules

The hole mobility of the investigated molecules is calculated by using the Einstein relation:<sup>1</sup>

$$\mu = \frac{er^2}{2k_B T} k \quad (\text{S1})$$

where  $e$  is the charge.  $r$  denotes the distance between two mass centers.

The Marcus theory with the hopping model is employed to describe the hole transport behavior.

The charge hopping rate ( $k$ ) is expressed as:<sup>2</sup>

$$k = \frac{4\pi^2}{h} v^2 \frac{1}{\sqrt{4\pi k_B T}} \exp\left[-\frac{\lambda}{4k_B T}\right] \quad (\text{S2})$$

where  $k_B$  represents the Boltzmann constant,  $T$  is the temperature in Kelvin, and  $h$  denotes the Planck constant.  $\lambda$  represents the reorganization energy, which is calculated by using the adiabatic potential energy surface method. In this work, only internal reorganization energy is considered. The reorganization energy can be expressed as follows:<sup>3</sup>

$$\lambda = (E_0^* - E_0) + (E_+^* - E_+) \quad (\text{S3})$$

where  $E_0^*$  and  $E_+^*$  are the total energies of neutral and cationic molecules with the geometries of the cationic and neutral species, respectively.  $E_+$  and  $E_0$  are the total energies of the cationic and neutral molecules in their lowest energy geometries, respectively.

$v$  denotes the transfer integral, which is obtained by adopting a direct approach at the M06-2X/6-31G (d, p) level. In our work,  $v$  can be written as:<sup>4</sup>

$$v = \langle \psi_i^{\text{HOMO}} | F | \psi_f^{\text{HOMO}} \rangle \quad (\text{S4})$$

where  $\psi_i^{\text{HOMO}}$  and  $\psi_f^{\text{HOMO}}$  represent the HOMOs of the isolated molecules 1 and 2.  $F$  is the Fock operator for the dimer, which can be calculated as:  $F = SC\varepsilon C^{-1}$

The Kohn-Sham Orbital  $C$  and eigenvalue  $\varepsilon$  are evaluated by diagonalizing the zeroth-order Fock matrix.  $S$  denotes the overlap matrix for the dimer.

### CH<sub>3</sub>NH<sub>3</sub>PbI<sub>3</sub>/HTMs interfacial properties

The plane wave energy cutoff is set to 500 eV with the application of periodic boundary conditions for the structures of HTM molecule and CH<sub>3</sub>NH<sub>3</sub>PbI<sub>3</sub> (797 atoms), and all atomic positions are fully relaxed during optimization (residual forces, <0.01 eV/Å). The k-point grids of  $1 \times 1 \times 1$  and  $2 \times 2 \times 1$  are adopted for geometry optimization and electronic properties

calculations, respectively. Van der Waals (vdW) interactions are considered with Grimme's DFT-D3 correction to describe weak interactions between the HTM molecule and  $\text{CH}_3\text{NH}_3\text{PbI}_3$ .<sup>5</sup>

Table S1 Calculated transition energy  $E_{0-0}$  (eV), maximum wavelengths  $\lambda_{ab}$  (nm), oscillator strength  $f$  of absorption, Transition (HOMO $\rightarrow$ LUMO) and the contribution of heteroatoms to the hole for the first excited state, transition energy  $E_1$  (eV), maximum wavelengths  $\lambda_{em}$  (nm) of emission and Stokes shifts (nm).

| Molecule          | $E_{0-0}$<br>(eV) | $\lambda_{ab}$<br>(nm) | $f$    | Transition<br>(HOMO $\rightarrow$<br>LUMO) | hole-<br>contribution (eV) | $E_1$<br>(eV) | $\lambda_{em}$<br>(nm) | Stokes shifts |
|-------------------|-------------------|------------------------|--------|--------------------------------------------|----------------------------|---------------|------------------------|---------------|
| <b>OMeTPA-TPA</b> | 3.21              | 386                    | 1.6554 | 78%                                        | /                          | 2.66          | 467                    | 80            |
| <b>OMeTPA-B</b>   | 2.45              | 507                    | 0.0591 | 9%                                         | 5.09                       | 2.15          | 576                    | 70            |
| <b>OMeTPA-C</b>   | 3.19              | 388                    | 1.359  | 87%                                        | 0.36                       | 2.67          | 464                    | 76            |
| <b>OMeTPA-Si</b>  | 3.05              | 407                    | 1.5223 | 89%                                        | 0.95                       | 2.47          | 503                    | 96            |
| <b>OMeTPA-Ge</b>  | 3.22              | 385                    | 1.7473 | 74%                                        | 0.49                       | 2.42          | 513                    | 128           |
| <b>OMeTPA-N</b>   | 2.45              | 506                    | 0.3476 | 91%                                        | 18.83                      | 1.78          | 695                    | 190           |
| <b>OMeTPA-P</b>   | 2.97              | 418                    | 1.3491 | 89%                                        | 2.56                       | 2.43          | 510                    | 92            |
| <b>OMeTPA-As</b>  | 2.96              | 419                    | 1.3504 | 90%                                        | 1.82                       | 2.40          | 516                    | 96            |
| <b>OMeTPA-O</b>   | 2.88              | 430                    | 0.7733 | 88%                                        | 10.96                      | 2.24          | 554                    | 123           |
| <b>OMeTPA-S</b>   | 2.61              | 476                    | 0.6162 | 87%                                        | 17.45                      | 2.16          | 573                    | 97            |
| <b>OMeTPA-Se</b>  | 2.50              | 496                    | 0.5407 | 85%                                        | 19.63                      | 2.04          | 607                    | 112           |

Table S2 Specific data for crystal structure analysis, including Space group, Cell volume (cm<sup>3</sup>), Density (g/cm<sup>3</sup>), Total energy (eV), Van der Waals energy (eV), Length a (Å), b (Å), c (Å).

| Molecule          | Space group | Cell volume          | Density | Total energy          | Van der Waals energy | Length a | Length b | Length c |
|-------------------|-------------|----------------------|---------|-----------------------|----------------------|----------|----------|----------|
| <b>OMeTPA-TPA</b> | P21         | 3.64×10 <sup>3</sup> | 1.05    | 182.54                | 81.29                | 22.44    | 11.06    | 16.68    |
| <b>OMeTPA-B</b>   | P21         | 3.54×10 <sup>3</sup> | 1.11    | 260.25                | 95.43                | 17.49    | 27.52    | 7.40     |
| <b>OMeTPA-C</b>   | P21         | 3.46×10 <sup>3</sup> | 1.14    | 106.28                | 96.96                | 17.77    | 11.94    | 17.40    |
| <b>OMeTPA-Si</b>  | P-1         | 3.77×10 <sup>3</sup> | 1.09    | 140.89                | 105.29               | 11.40    | 20.36    | 17.15    |
| <b>OMeTPA-Ge</b>  | P21         | 3.83×10 <sup>3</sup> | 1.19    | 260.58                | 92.41                | 16.19    | 25.68    | 9.23     |
| <b>OMeTPA-N</b>   | P21         | 3.31×10 <sup>3</sup> | 1.20    | -18.37                | 93.50                | 18.13    | 12.15    | 16.20    |
| <b>OMeTPA-P</b>   | P21         | 3.60×10 <sup>3</sup> | 1.15    | 233.76                | 106.10               | 15.92    | 20.26    | 11.54    |
| <b>OMeTPA-As</b>  | P21         | 4.33×10 <sup>3</sup> | 1.06    | -1.08×10 <sup>4</sup> | 1.39×10 <sup>3</sup> | 25.83    | 6.98     | 27.06    |
| <b>OMeTPA-O</b>   | P21         | 3.45×10 <sup>3</sup> | 1.15    | 137.38                | 89.98                | 7.41     | 26.73    | 20.09    |
| <b>OMeTPA-S</b>   | P21         | 3.51×10 <sup>3</sup> | 1.18    | 154.46                | 93.17                | 8.15     | 22.10    | 24.63    |
| <b>OMeTPA-Se</b>  | P21         | 3.25×10 <sup>3</sup> | 1.42    | -1.79×10 <sup>4</sup> | 2.38×10 <sup>3</sup> | 19.25    | 7.21     | 24.60    |



Table S3 The transfer integrals  $V_{DA}$  (eV), hole-hopping rate  $k_h$  ( $s^{-1}$ ), centroid-to-centroid distances  $r$  (cm), the hole mobility  $\mu_h$  ( $cm^2 v^{-1} s^{-1}$ ) for main hopping pathways selected and the total hole mobility  $\mu$  ( $cm^2 v^{-1} s^{-1}$ ) based on the predicted crystalline structures of **OMeTPA-TPA**.

| <b>OMeTPA-TPA</b>                                                                  |                        |                       |                       |                       |                       |
|------------------------------------------------------------------------------------|------------------------|-----------------------|-----------------------|-----------------------|-----------------------|
| 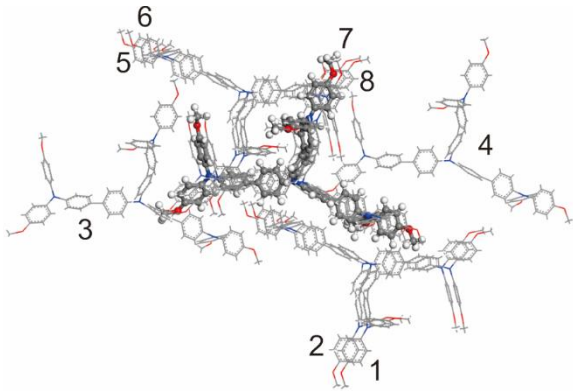 |                        |                       |                       |                       |                       |
| pathway                                                                            | $V_{DA}$               | $k_h$                 | $r$                   | $\mu_h$               | $\mu$                 |
| 1                                                                                  | $9.0 \times 10^{-5}$   | $1.33 \times 10^8$    | $1.11 \times 10^{-7}$ | $3.13 \times 10^{-5}$ | $2.42 \times 10^{-3}$ |
| 2                                                                                  | $8.97 \times 10^{-5}$  | $1.32 \times 10^8$    | $1.11 \times 10^{-7}$ | $3.10 \times 10^{-5}$ |                       |
| 3                                                                                  | $-3.48 \times 10^{-4}$ | $1.99 \times 10^9$    | $1.67 \times 10^{-7}$ | $1.06 \times 10^{-3}$ |                       |
| 4                                                                                  | $-3.44 \times 10^{-4}$ | $1.95 \times 10^9$    | $1.67 \times 10^{-7}$ | $1.04 \times 10^{-3}$ |                       |
| 5                                                                                  | $-1.45 \times 10^{-3}$ | $3.46 \times 10^{10}$ | $1.07 \times 10^{-7}$ | $7.63 \times 10^{-3}$ |                       |
| 6                                                                                  | $-1.46 \times 10^{-3}$ | $3.48 \times 10^{10}$ | $1.07 \times 10^{-7}$ | $7.67 \times 10^{-3}$ |                       |
| 7                                                                                  | $1.10 \times 10^{-3}$  | $1.97 \times 10^{10}$ | $1.44 \times 10^{-7}$ | $7.83 \times 10^{-3}$ |                       |
| 8                                                                                  | $1.10 \times 10^{-3}$  | $1.98 \times 10^{10}$ | $1.44 \times 10^{-7}$ | $7.88 \times 10^{-3}$ |                       |

Table S4 The transfer integrals  $V_{DA}$  (eV), hole-hopping rate  $k_h$  ( $s^{-1}$ ), centroid-to-centroid distances  $r$  (cm), the hole mobility  $\mu_h$  ( $cm^2 v^{-1} s^{-1}$ ) for main hopping pathways selected and the total hole mobility  $\mu$  ( $cm^2 v^{-1} s^{-1}$ ) based on the predicted crystalline structures of **OMeTPA-B**.

| <b>OMeTPA-B</b>                                                                    |                        |                    |                       |                       |                       |
|------------------------------------------------------------------------------------|------------------------|--------------------|-----------------------|-----------------------|-----------------------|
| 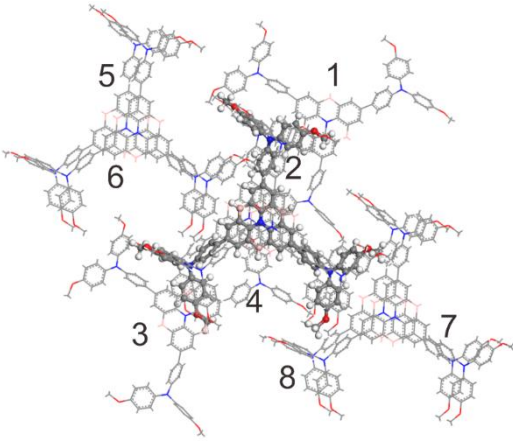 |                        |                    |                       |                       |                       |
| pathway                                                                            | $V_{DA}$               | $k_h$              | $r$                   | $\mu_h$               | $\mu$                 |
| 1                                                                                  | $1.03 \times 10^{-3}$  | $9.20 \times 10^9$ | $1.38 \times 10^{-7}$ | $3.39 \times 10^{-3}$ | $1.09 \times 10^{-3}$ |
| 2                                                                                  | $-5.04 \times 10^{-6}$ | $2.21 \times 10^5$ | $7.41 \times 10^{-8}$ | $2.33 \times 10^{-8}$ |                       |
| 3                                                                                  | $8.37 \times 10^{-4}$  | $6.09 \times 10^9$ | $1.38 \times 10^{-7}$ | $2.25 \times 10^{-3}$ |                       |
| 4                                                                                  | $1.03 \times 10^{-3}$  | $9.20 \times 10^9$ | $1.38 \times 10^{-7}$ | $3.39 \times 10^{-3}$ |                       |
| 5                                                                                  | $-2.16 \times 10^{-4}$ | $4.05 \times 10^8$ | $1.75 \times 10^{-7}$ | $2.38 \times 10^{-4}$ |                       |
| 6                                                                                  | $-8.01 \times 10^{-4}$ | $5.58 \times 10^9$ | $1.98 \times 10^{-7}$ | $4.21 \times 10^{-3}$ |                       |
| 7                                                                                  | $-7.97 \times 10^{-4}$ | $5.52 \times 10^9$ | $1.98 \times 10^{-7}$ | $4.17 \times 10^{-3}$ |                       |
| 8                                                                                  | $-2.15 \times 10^{-4}$ | $4.02 \times 10^8$ | $1.75 \times 10^{-7}$ | $2.37 \times 10^{-4}$ |                       |

Table S5 The transfer integrals  $V_{DA}$  (eV), hole-hopping rate  $k_h$  ( $s^{-1}$ ), centroid-to-centroid distances  $r$  (cm), the hole mobility  $\mu_h$  ( $cm^2 v^{-1} s^{-1}$ ) for main hopping pathways selected and the total hole mobility  $\mu$  ( $cm^2 v^{-1} s^{-1}$ ) based on the predicted crystalline structures of **OMeTPA-C**.

| <b>OMeTPA-C</b>                                                                    |                        |                       |                       |                       |                       |
|------------------------------------------------------------------------------------|------------------------|-----------------------|-----------------------|-----------------------|-----------------------|
| 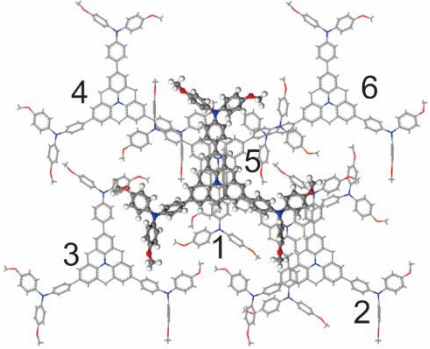 |                        |                       |                       |                       |                       |
| pathway                                                                            | $V_{DA}$               | $k_h$                 | $r$                   | $\mu_h$               | $\mu$                 |
| 1                                                                                  | $-1.31 \times 10^{-2}$ | $2.21 \times 10^{11}$ | $4.17 \times 10^{-8}$ | $7.38 \times 10^{-2}$ | $2.89 \times 10^{-2}$ |
| 2                                                                                  | $-6.29 \times 10^{-3}$ | $5.07 \times 10^{11}$ | $1.24 \times 10^{-7}$ | $1.49 \times 10^{-1}$ |                       |
| 3                                                                                  | $-4.84 \times 10^{-4}$ | $3.00 \times 10^9$    | $1.86 \times 10^{-7}$ | $1.99 \times 10^{-3}$ |                       |
| 4                                                                                  | $1.34 \times 10^{-3}$  | $2.30 \times 10^{10}$ | $1.96 \times 10^{-7}$ | $1.70 \times 10^{-2}$ |                       |
| 5                                                                                  | $1.34 \times 10^{-3}$  | $2.30 \times 10^{10}$ | $1.95 \times 10^{-7}$ | $1.68 \times 10^{-2}$ |                       |
| 6                                                                                  | $-4.85 \times 10^{-4}$ | $3.02 \times 10^9$    | $1.87 \times 10^{-7}$ | $2.03 \times 10^{-3}$ |                       |

Table S6 The transfer integrals  $V_{DA}$  (eV), hole-hopping rate  $k_h$  ( $s^{-1}$ ), centroid-to-centroid distances  $r$  (cm), the hole mobility  $\mu_h$  ( $cm^2 v^{-1} s^{-1}$ ) for main hopping pathways selected and the total hole mobility  $\mu$  ( $cm^2 v^{-1} s^{-1}$ ) based on the predicted crystalline structures of **OMeTPA-Si**.

| <b>OMeTPA-Si</b>                                                                   |                        |                       |                       |                       |                       |
|------------------------------------------------------------------------------------|------------------------|-----------------------|-----------------------|-----------------------|-----------------------|
| 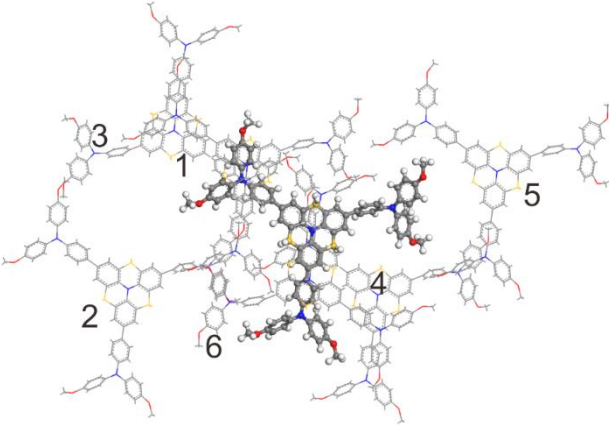 |                        |                       |                       |                       |                       |
| pathway                                                                            | $V_{DA}$               | $k_h$                 | $r$                   | $\mu_h$               | $\mu$                 |
| 1                                                                                  | $-5.79 \times 10^{-3}$ | $3.64 \times 10^{11}$ | $1.14 \times 10^{-7}$ | $9.09 \times 10^{-2}$ | $1.27 \times 10^{-1}$ |
| 2                                                                                  | $-6.95 \times 10^{-4}$ | $5.25 \times 10^9$    | $2.23 \times 10^{-7}$ | $5.00 \times 10^{-3}$ |                       |
| 3                                                                                  | $9.40 \times 10^{-3}$  | $9.59 \times 10^{11}$ | $2.02 \times 10^{-7}$ | $7.50 \times 10^{-1}$ |                       |
| 4                                                                                  | $-5.78 \times 10^{-3}$ | $3.63 \times 10^{11}$ | $1.14 \times 10^{-7}$ | $9.08 \times 10^{-2}$ |                       |
| 5                                                                                  | $-6.95 \times 10^{-4}$ | $5.25 \times 10^9$    | $2.23 \times 10^{-7}$ | $5.00 \times 10^{-3}$ |                       |
| 6                                                                                  | $-6.11 \times 10^{-3}$ | $4.06 \times 10^{11}$ | $7.37 \times 10^{-8}$ | $4.23 \times 10^{-2}$ |                       |

Table S7 The transfer integrals  $V_{DA}$  (eV), hole-hopping rate  $k_h$  ( $s^{-1}$ ), centroid-to-centroid distances  $r$  (cm), the hole mobility  $\mu_h$  ( $cm^2 v^{-1} s^{-1}$ ) for main hopping pathways selected and the total hole mobility  $\mu$  ( $cm^2 v^{-1} s^{-1}$ ) based on the predicted crystalline structures of **OMeTPA-Ge**.

| <b>OMeTPA-Ge</b>                                                                   |                        |                       |                       |                       |                       |
|------------------------------------------------------------------------------------|------------------------|-----------------------|-----------------------|-----------------------|-----------------------|
| 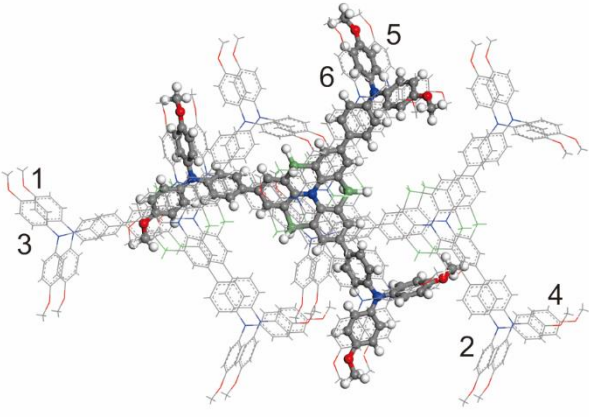 |                        |                       |                       |                       |                       |
| pathway                                                                            | $V_{DA}$               | $k_h$                 | $r$                   | $\mu_h$               | $\mu$                 |
| 1                                                                                  | $-1.87 \times 10^{-3}$ | $1.76 \times 10^{10}$ | $2.08 \times 10^{-7}$ | $1.46 \times 10^{-2}$ | $3.90 \times 10^{-3}$ |
| 2                                                                                  | $-2.21 \times 10^{-4}$ | $2.45 \times 10^8$    | $1.14 \times 10^{-7}$ | $6.13 \times 10^{-5}$ |                       |
| 3                                                                                  | $-2.20 \times 10^{-4}$ | $2.44 \times 10^8$    | $1.14 \times 10^{-7}$ | $6.11 \times 10^{-5}$ |                       |
| 4                                                                                  | $-1.87 \times 10^{-3}$ | $1.76 \times 10^{10}$ | $2.08 \times 10^{-7}$ | $1.46 \times 10^{-2}$ |                       |
| 5                                                                                  | $-1.53 \times 10^{-3}$ | $1.17 \times 10^{10}$ | $1.22 \times 10^{-7}$ | $3.37 \times 10^{-3}$ |                       |
| 6                                                                                  | $-1.53 \times 10^{-3}$ | $1.17 \times 10^{10}$ | $1.22 \times 10^{-7}$ | $3.38 \times 10^{-3}$ |                       |

Table S8 The transfer integrals  $V_{DA}$  (eV), hole-hopping rate  $k_h$  ( $s^{-1}$ ), centroid-to-centroid distances  $r$  (cm), the hole mobility  $\mu_h$  ( $cm^2 v^{-1} s^{-1}$ ) for main hopping pathways selected and the total hole mobility  $\mu$  ( $cm^2 v^{-1} s^{-1}$ ) based on the predicted crystalline structures of **OMeTPA-N**.

| <b>OMeTPA-N</b>                                                                    |                         |                    |                       |                       |                        |
|------------------------------------------------------------------------------------|-------------------------|--------------------|-----------------------|-----------------------|------------------------|
| 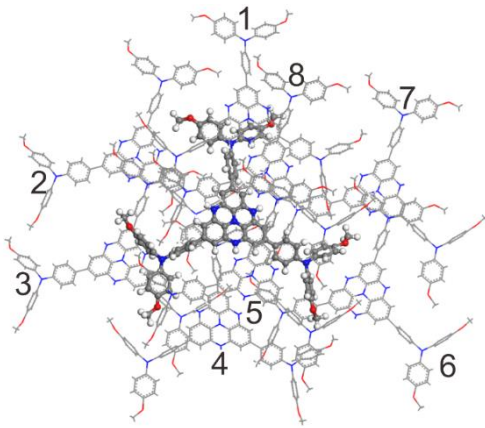 |                         |                    |                       |                       |                        |
| pathway                                                                            | $V_{DA}$                | $k_h$              | $r$                   | $\mu_h$               | $\mu$                  |
| 1                                                                                  | $-1.45 \times 10^{-3}$  | $9.81 \times 10^8$ | $1.22 \times 10^{-7}$ | $2.79 \times 10^{-4}$ | $9.221 \times 10^{-5}$ |
| 2                                                                                  | $6.46 \times 10^{-5}$   | $1.96 \times 10^6$ | $1.43 \times 10^{-7}$ | $7.73 \times 10^{-7}$ |                        |
| 3                                                                                  | $6.47 \times 10^{-5}$   | $1.96 \times 10^6$ | $1.43 \times 10^{-7}$ | $7.75 \times 10^{-7}$ |                        |
| 4                                                                                  | $-1.448 \times 10^{-3}$ | $9.84 \times 10^8$ | $1.22 \times 10^{-7}$ | $2.79 \times 10^{-4}$ |                        |
| 5                                                                                  | $-1.68 \times 10^{-4}$  | $1.32 \times 10^7$ | $8.59 \times 10^{-8}$ | $1.88 \times 10^{-6}$ |                        |
| 6                                                                                  | $-2.50 \times 10^{-5}$  | $2.94 \times 10^5$ | $1.79 \times 10^{-7}$ | $1.81 \times 10^{-7}$ |                        |
| 7                                                                                  | $6.92 \times 10^{-5}$   | $2.25 \times 10^6$ | $1.79 \times 10^{-7}$ | $1.38 \times 10^{-6}$ |                        |
| 8                                                                                  | $-1.65 \times 10^{-4}$  | $1.28 \times 10^7$ | $8.59 \times 10^{-8}$ | $1.82 \times 10^{-6}$ |                        |

Table S9 The transfer integrals  $V_{DA}$  (eV), hole-hopping rate  $k_h$  ( $s^{-1}$ ), centroid-to-centroid distances  $r$  (cm), the hole mobility  $\mu_h$  ( $cm^2 v^{-1} s^{-1}$ ) for main hopping pathways selected and the total hole mobility  $\mu$  ( $cm^2 v^{-1} s^{-1}$ ) based on the predicted crystalline structures of **OMeTPA-P**.

| <b>OMeTPA-P</b>                                                                    |                        |                       |                       |                       |                       |
|------------------------------------------------------------------------------------|------------------------|-----------------------|-----------------------|-----------------------|-----------------------|
| 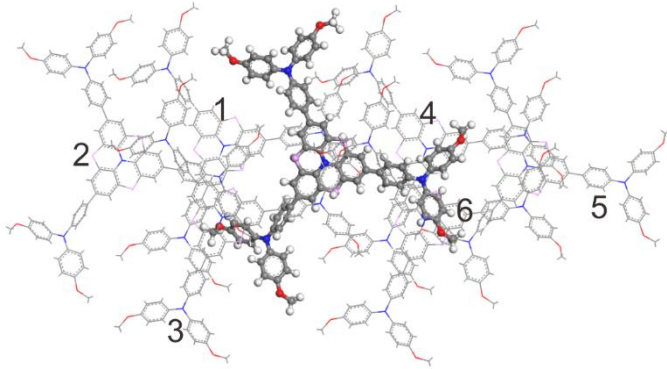 |                        |                       |                       |                       |                       |
| pathway                                                                            | $V_{DA}$               | $k_h$                 | $r$                   | $\mu_h$               | $\mu$                 |
| 1                                                                                  | $6.47 \times 10^{-5}$  | $4.64 \times 10^7$    | $1.04 \times 10^{-7}$ | $9.71 \times 10^{-6}$ | $1.11 \times 10^{-1}$ |
| 2                                                                                  | $-5.74 \times 10^{-4}$ | $3.64 \times 10^{11}$ | $2.03 \times 10^{-7}$ | $2.87 \times 10^{-3}$ |                       |
| 3                                                                                  | $9.06 \times 10^{-3}$  | $9.07 \times 10^{11}$ | $1.36 \times 10^{-7}$ | $3.22 \times 10^{-1}$ |                       |
| 4                                                                                  | $6.41 \times 10^{-5}$  | $4.55 \times 10^7$    | $1.04 \times 10^{-7}$ | $9.52 \times 10^{-6}$ |                       |
| 5                                                                                  | $-5.73 \times 10^{-4}$ | $3.63 \times 10^{11}$ | $2.03 \times 10^{-7}$ | $2.86 \times 10^{-3}$ |                       |
| 6                                                                                  | $9.07 \times 10^{-3}$  | $9.11 \times 10^{11}$ | $1.40 \times 10^{-7}$ | $3.44 \times 10^{-1}$ |                       |

Table S10 The transfer integrals  $V_{DA}$  (eV), hole-hopping rate  $k_h$  ( $s^{-1}$ ), centroid-to-centroid distances  $r$  (cm), the hole mobility  $\mu_h$  ( $cm^2 v^{-1} s^{-1}$ ) for main hopping pathways selected and the total hole mobility  $\mu$  ( $cm^2 v^{-1} s^{-1}$ ) based on the predicted crystalline structures of **OMeTPA-As**.

| <b>OMeTPA-As</b>                                                                   |                        |                       |                       |                        |                       |
|------------------------------------------------------------------------------------|------------------------|-----------------------|-----------------------|------------------------|-----------------------|
| 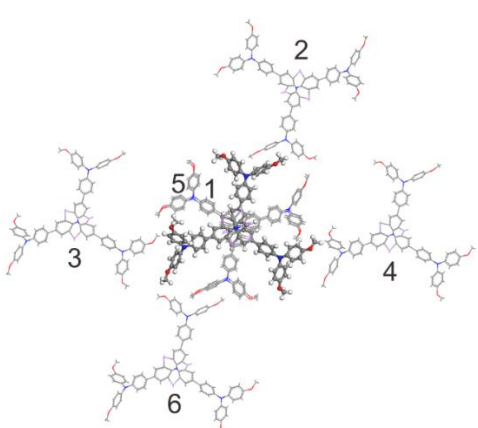 |                        |                       |                       |                        |                       |
| pathway                                                                            | $V_{DA}$               | $k_h$                 | $r$                   | $\mu_h$                | $\mu$                 |
| 1                                                                                  | $-3.64 \times 10^{-2}$ | $9.96 \times 10^{12}$ | $3.52 \times 10^{-8}$ | $2.37 \times 10^{-1}$  | $7.91 \times 10^{-2}$ |
| 2                                                                                  | $-2.91 \times 10^{-4}$ | $6.40 \times 10^8$    | $6.98 \times 10^{-8}$ | $6.00 \times 10^{-5}$  |                       |
| 3                                                                                  | $4.67 \times 10^{-7}$  | $1.64 \times 10^3$    | $2.58 \times 10^{-7}$ | $2.11 \times 10^{-9}$  |                       |
| 4                                                                                  | $1.41 \times 10^{-7}$  | $1.50 \times 10^2$    | $2.64 \times 10^{-7}$ | $2.01 \times 10^{-10}$ |                       |
| 5                                                                                  | $-3.64 \times 10^{-2}$ | $9.97 \times 10^{12}$ | $3.52 \times 10^{-8}$ | $2.37 \times 10^{-1}$  |                       |
| 6                                                                                  | $-2.91 \times 10^{-4}$ | $6.36 \times 10^8$    | $6.98 \times 10^{-8}$ | $5.96 \times 10^{-5}$  |                       |



Table S11 The transfer integrals  $V_{DA}$  (eV), hole-hopping rate  $k_h$  ( $s^{-1}$ ), centroid-to-centroid distances  $r$  (cm), the hole mobility  $\mu_h$  ( $cm^2 v^{-1} s^{-1}$ ) for main hopping pathways selected and the total hole mobility  $\mu$  ( $cm^2 v^{-1} s^{-1}$ ) based on the predicted crystalline structures of **OMeTPA-O**.

| <b>OMeTPA-O</b>                                                                    |                        |                       |                       |                       |                       |
|------------------------------------------------------------------------------------|------------------------|-----------------------|-----------------------|-----------------------|-----------------------|
| 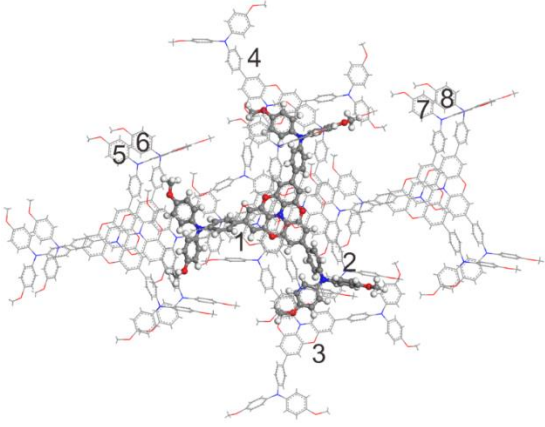 |                        |                       |                       |                       |                       |
| pathway                                                                            | $V_{DA}$               | $k_h$                 | $r$                   | $\mu_h$               | $\mu$                 |
| 1                                                                                  | $5.05 \times 10^{-5}$  | $3.84 \times 10^6$    | $7.41 \times 10^{-8}$ | $4.05 \times 10^{-7}$ | $9.93 \times 10^{-3}$ |
| 2                                                                                  | $5.07 \times 10^{-5}$  | $3.86 \times 10^6$    | $7.41 \times 10^{-8}$ | $4.08 \times 10^{-7}$ |                       |
| 3                                                                                  | $7.55 \times 10^{-3}$  | $8.56 \times 10^{10}$ | $1.35 \times 10^{-7}$ | $2.99 \times 10^{-2}$ |                       |
| 4                                                                                  | $7.54 \times 10^{-3}$  | $8.54 \times 10^{10}$ | $1.35 \times 10^{-7}$ | $2.98 \times 10^{-2}$ |                       |
| 5                                                                                  | $-2.65 \times 10^{-4}$ | $1.06 \times 10^8$    | $2.01 \times 10^{-7}$ | $8.21 \times 10^{-5}$ |                       |
| 6                                                                                  | $-2.51 \times 10^{-4}$ | $9.47 \times 10^7$    | $1.76 \times 10^{-7}$ | $5.64 \times 10^{-5}$ |                       |
| 7                                                                                  | $-2.51 \times 10^{-4}$ | $9.45 \times 10^7$    | $1.76 \times 10^{-7}$ | $5.63 \times 10^{-5}$ |                       |
| 8                                                                                  | $-2.65 \times 10^{-4}$ | $1.06 \times 10^8$    | $2.01 \times 10^{-7}$ | $8.22 \times 10^{-5}$ |                       |

Table S12 The transfer integrals  $V_{DA}$  (eV), hole-hopping rate  $k_h$  ( $s^{-1}$ ), centroid-to-centroid distances  $r$  (cm), the hole mobility  $\mu_h$  ( $cm^2 v^{-1} s^{-1}$ ) for main hopping pathways selected and the total hole mobility  $\mu$  ( $cm^2 v^{-1} s^{-1}$ ) based on the predicted crystalline structures of **OMeTPA-S**.

| <b>OMeTPA-S</b>                                                                   |                        |                       |                       |                       |                       |
|-----------------------------------------------------------------------------------|------------------------|-----------------------|-----------------------|-----------------------|-----------------------|
| 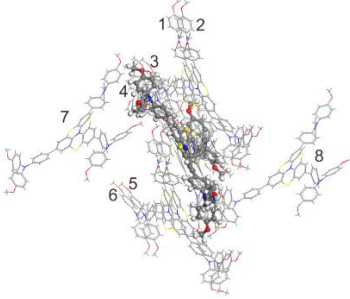 |                        |                       |                       |                       |                       |
| pathway                                                                           | $V_{DA}$               | $k_h$                 | $r$                   | $\mu_h$               | $\mu$                 |
| 1                                                                                 | $2.92 \times 10^{-3}$  | $1.32 \times 10^{11}$ | $1.05 \times 10^{-7}$ | $2.81 \times 10^{-2}$ | $2.30 \times 10^{-1}$ |
| 2                                                                                 | $2.92 \times 10^{-3}$  | $1.32 \times 10^{11}$ | $1.07 \times 10^{-7}$ | $2.88 \times 10^{-2}$ |                       |
| 3                                                                                 | $-1.36 \times 10^{-2}$ | $2.86 \times 10^{12}$ | $1.15 \times 10^{-7}$ | $7.21 \times 10^{-1}$ |                       |
| 4                                                                                 | $-1.36 \times 10^{-2}$ | $2.86 \times 10^{12}$ | $1.15 \times 10^{-7}$ | $7.21 \times 10^{-1}$ |                       |
| 5                                                                                 | $-1.02 \times 10^{-4}$ | $1.62 \times 10^8$    | $1.17 \times 10^{-7}$ | $4.28 \times 10^{-5}$ |                       |
| 6                                                                                 | $-1.05 \times 10^{-4}$ | $1.71 \times 10^8$    | $1.17 \times 10^{-7}$ | $4.51 \times 10^{-5}$ |                       |
| 7                                                                                 | $1.05 \times 10^{-4}$  | $1.69 \times 10^8$    | $1.63 \times 10^{-7}$ | $8.68 \times 10^{-5}$ |                       |
| 8                                                                                 | $1.05 \times 10^{-4}$  | $1.69 \times 10^8$    | $1.63 \times 10^{-7}$ | $8.69 \times 10^{-5}$ |                       |

Table S13 The transfer integrals  $V_{DA}$  (eV), hole-hopping rate  $k_h$  ( $s^{-1}$ ), centroid-to-centroid distances  $r$  (cm), the hole mobility  $\mu_h$  ( $cm^2 v^{-1} s^{-1}$ ) for main hopping pathways selected and the total hole mobility  $\mu$  ( $cm^2 v^{-1} s^{-1}$ ) based on the predicted crystalline structures of **OMeTPA-Se**.

| <b>OMeTPA-Se</b>                                                                   |                        |                       |                       |                        |                       |
|------------------------------------------------------------------------------------|------------------------|-----------------------|-----------------------|------------------------|-----------------------|
| 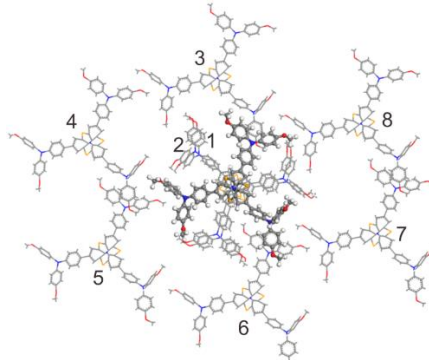 |                        |                       |                       |                        |                       |
| pathway                                                                            | $V_{DA}$               | $k_h$                 | $r$                   | $\mu_h$                | $\mu$                 |
| 1                                                                                  | $-7.85 \times 10^{-2}$ | $7.10 \times 10^{13}$ | $3.62 \times 10^{-8}$ | $1.78 \times 10^0$     | $5.94 \times 10^{-1}$ |
| 2                                                                                  | $-7.84 \times 10^{-2}$ | $7.09 \times 10^{13}$ | $3.62 \times 10^{-8}$ | $1.78 \times 10^0$     |                       |
| 3                                                                                  | $3.8 \times 10^{-5}$   | $2.67 \times 10^2$    | $1.93 \times 10^{-7}$ | $1.90 \times 10^{-10}$ |                       |
| 4                                                                                  | $-1.52 \times 10^{-7}$ | $7.71 \times 10^5$    | $2.61 \times 10^{-7}$ | $1.01 \times 10^{-6}$  |                       |
| 5                                                                                  | $8.18 \times 10^{-6}$  | $1.59 \times 10^7$    | $2.46 \times 10^{-7}$ | $1.85 \times 10^{-5}$  |                       |
| 6                                                                                  | $3.72 \times 10^{-5}$  | $1.59 \times 10^7$    | $1.93 \times 10^{-7}$ | $1.14 \times 10^{-5}$  |                       |
| 7                                                                                  | $-1.48 \times 10^{-7}$ | $2.52 \times 10^2$    | $2.61 \times 10^{-7}$ | $3.32 \times 10^{-10}$ |                       |
| 8                                                                                  | $8.26 \times 10^{-6}$  | $7.86 \times 10^5$    | $2.46 \times 10^{-7}$ | $9.15 \times 10^{-7}$  |                       |

Table S14 The combination modes and surface adsorption energy (eV) of central core and perovskite surface (001 face).

| Molecule          | the surface adsorption energy (eV) |                 | The most stable combination mode |
|-------------------|------------------------------------|-----------------|----------------------------------|
|                   | Pb-N controlled                    | Pb-X controlled |                                  |
| <b>OMeTPA-TPA</b> | -0.69                              | -0.32           | Pb-N controlled                  |
| <b>OMeTPA-B</b>   | -0.78                              | -1.26           | Pb-X controlled                  |
| <b>OMeTPA-C</b>   | -1.19                              | -1.12           | Pb-N controlled                  |
| <b>OMeTPA-Si</b>  | -0.81                              | -0.57           | Pb-N controlled                  |
| <b>OMeTPA-Ge</b>  | -1.23                              | -0.89           | Pb-N controlled                  |
| <b>OMeTPA-N</b>   | -1.73                              | -1.19           | Pb-N controlled                  |
| <b>OMeTPA-P</b>   | -0.81                              | -0.53           | Pb-N controlled                  |
| <b>OMeTPA-As</b>  | -0.86                              | -0.61           | Pb-N controlled                  |
| <b>OMeTPA-O</b>   | -1.01                              | -1.17           | Pb-X controlled                  |
| <b>OMeTPA-S</b>   | -1.25                              | -1.82           | Pb-X controlled                  |
| <b>OMeTPA-Se</b>  | -1.26                              | -1.85           | Pb-X controlled                  |

Table S15 The optimized structures of Pb-N and Pb-X models of central core and perovskite surface (001 face).

|       | Pb-N controlled                                                                     | Pb-X controlled                                                                     |      | Pb-N controlled                                                                      | Pb-X controlled                                                                       |
|-------|-------------------------------------------------------------------------------------|-------------------------------------------------------------------------------------|------|--------------------------------------------------------------------------------------|---------------------------------------------------------------------------------------|
| R-TPA | 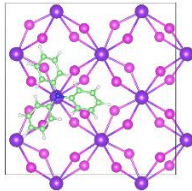   |    | R-N  |    |    |
| R-B   |    |    | R-P  |    |    |
| R-C   |    |    | R-As |    |    |
| R-Si  |  |  | R-O  |  |  |
| R-Ge  |  |  | R-S  |  |  |
|       |                                                                                     |                                                                                     | R-Se |  |  |

Table S16 The Pb-N (Pb-X) bond lengths (Å) of the most stable combination mode of central core and perovskite surface (Corresponding to the structure in **Figure S5**).

| Molecule          | The most stable combination mode | Figure S5             |                        |                        |
|-------------------|----------------------------------|-----------------------|------------------------|------------------------|
|                   |                                  | Pb-N bond lengths (Å) | Pb-X1 bond lengths (Å) | Pb-X2 bond lengths (Å) |
| <b>OMeTPA-TPA</b> | Pb-N controlled                  | 4.70                  | /                      | /                      |
| <b>OMeTPA-B</b>   | Pb-X controlled                  | /                     | 3.24                   | 3.35                   |
| <b>OMeTPA-C</b>   | Pb-N controlled                  | 2.90                  | /                      | /                      |
| <b>OMeTPA-Si</b>  | Pb-N controlled                  | 4.63                  | /                      | /                      |
| <b>OMeTPA-Ge</b>  | Pb-N controlled                  | 3.47                  | /                      | /                      |
| <b>OMeTPA-N</b>   | Pb-N controlled                  | 4.03                  | /                      | /                      |
| <b>OMeTPA-P</b>   | Pb-N controlled                  | 4.76                  | /                      | /                      |
| <b>OMeTPA-As</b>  | Pb-N controlled                  | 4.64                  | /                      | /                      |
| <b>OMeTPA-O</b>   | Pb-X controlled                  | /                     | 3.09                   | 3.12                   |
| <b>OMeTPA-S</b>   | Pb-X controlled                  | /                     | 3.11                   | 3.05                   |
| <b>OMeTPA-Se</b>  | Pb-X controlled                  | /                     | 3.11                   | 3.11                   |

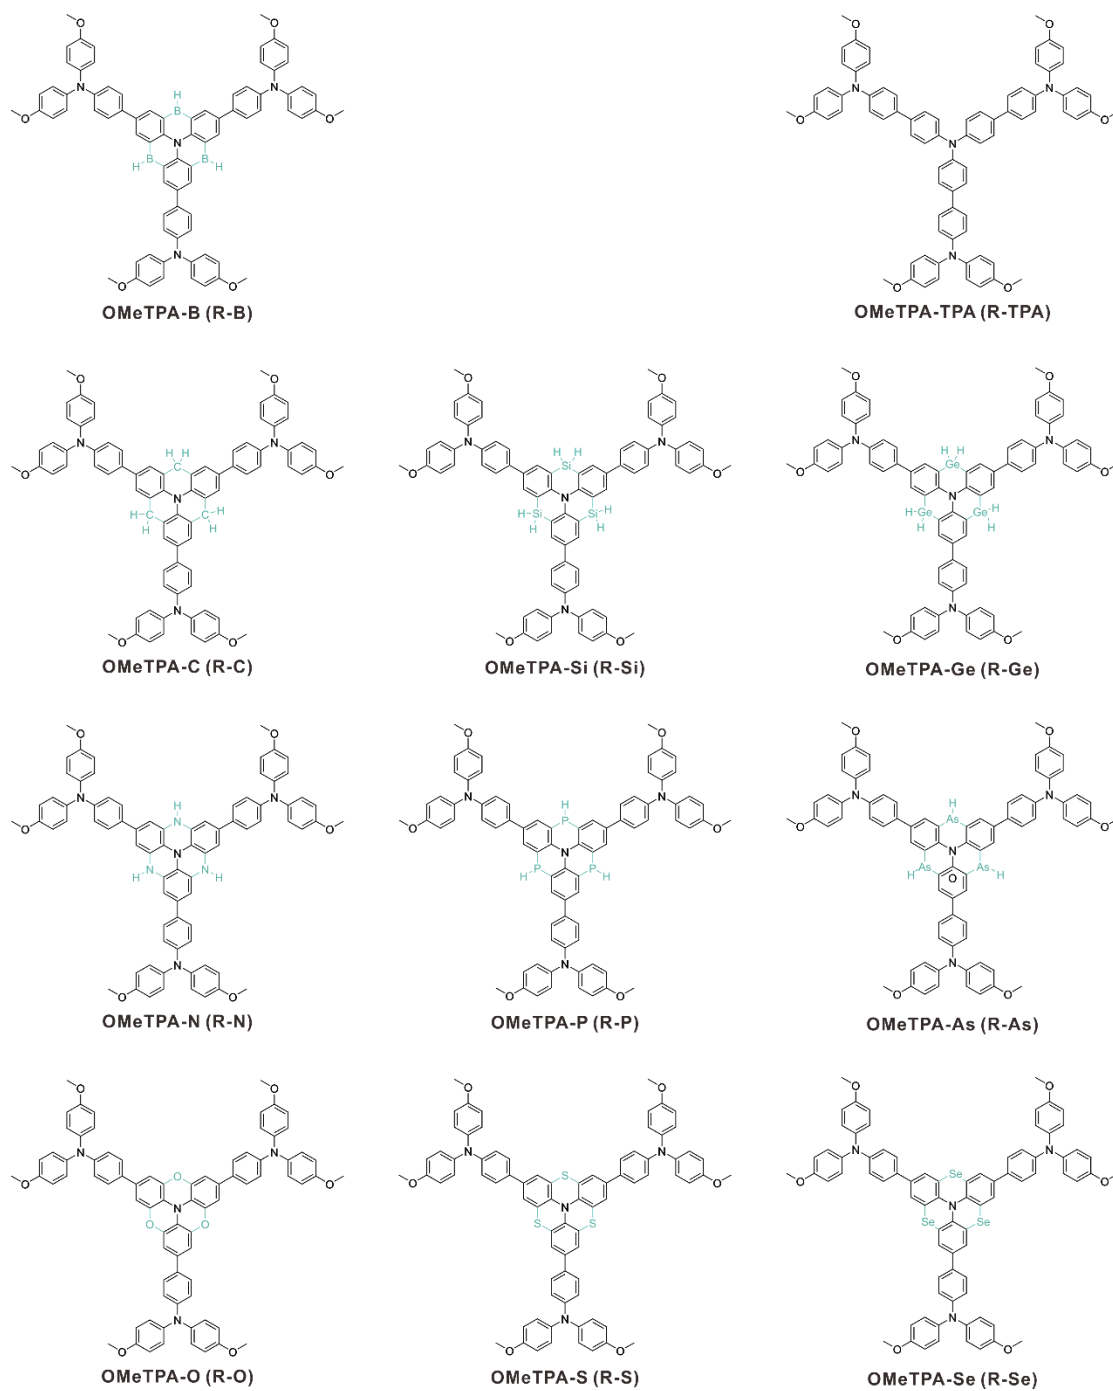

Figure S1 The chemical structures and full names of the study molecules.

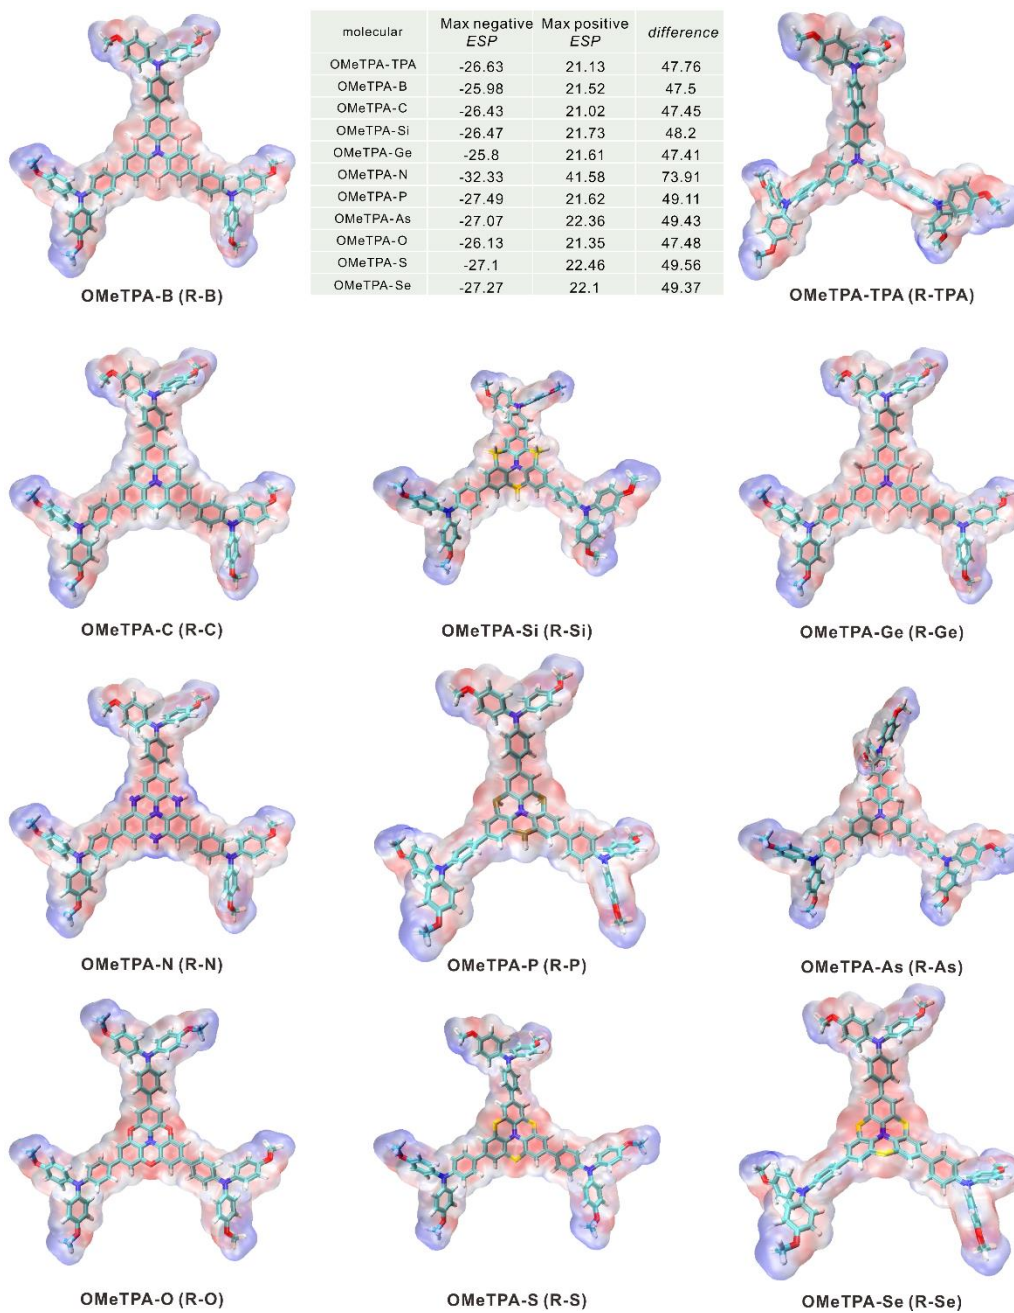

Figure S2 Molecular electrostatic potentials (*ESP*) of **R-TPA** and **R-X**, along with the Max positive *ESP*, Max negative *ESP*, and the difference between positive and negative *ESP* of the investigated molecules, units are expressed in kcal mol<sup>-1</sup>.



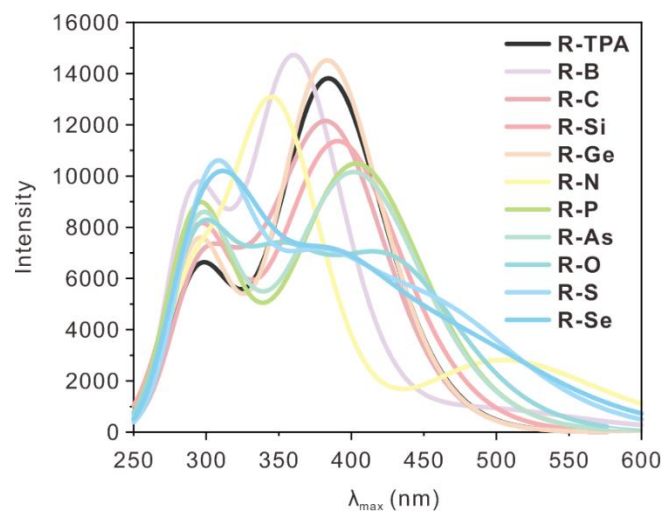

Figure S3 Calculated absorption spectra of the studied molecules.

|                                                                                                 |                                                                                   |           |                                                                                   |           |                                                                                    |           |                                                                                     |
|-------------------------------------------------------------------------------------------------|-----------------------------------------------------------------------------------|-----------|-----------------------------------------------------------------------------------|-----------|------------------------------------------------------------------------------------|-----------|-------------------------------------------------------------------------------------|
| <b>B</b>                                                                                        | 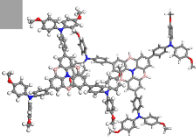 | <b>C</b>  |  | <b>N</b>  |  | <b>O</b>  |  |
|                                                                                                 | 0.16<br>$1.38 \times 10^{-7}$<br>$1.03 \times 10^{-3}$<br>0.001                   |           | 0.13<br>$4.17 \times 10^{-8}$<br>$-1.31 \times 10^{-2}$<br>0.029                  |           | 0.42<br>$1.22 \times 10^{-7}$<br>$-1.45 \times 10^{-3}$<br>0.00009                 |           | 0.31<br>$1.35 \times 10^{-7}$<br>$7.55 \times 10^{-3}$<br>0.010                     |
| <b>TPA</b>                                                                                      |  | <b>Si</b> |  | <b>P</b>  |  | <b>S</b>  |  |
|                                                                                                 | 0.12<br>$1.07 \times 10^{-7}$<br>$-1.46 \times 10^{-3}$<br>0.002                  |           | 0.15<br>$2.02 \times 10^{-7}$<br>$9.40 \times 10^{-3}$<br>0.127                   |           | 0.14<br>$1.40 \times 10^{-7}$<br>$9.07 \times 10^{-3}$<br>0.111                    |           | 0.12<br>$1.15 \times 10^{-7}$<br>$-1.36 \times 10^{-2}$<br>0.230                    |
| <b>reorganization energy (<math>\lambda</math>, eV)</b>                                         |                                                                                   |           |                                                                                   | <b>Ge</b> |   | <b>As</b> |   |
| <b>centroid distances (<math>r</math>, cm)</b>                                                  |                                                                                   |           |                                                                                   |           | 0.21<br>$2.08 \times 10^{-7}$<br>$-1.87 \times 10^{-3}$<br>0.004                   |           | 0.17<br>$3.52 \times 10^{-8}$<br>$-3.64 \times 10^{-2}$<br>0.079                    |
| <b>transfer integrals (<math>V</math>, eV)</b>                                                  |                                                                                   |           |                                                                                   |           |                                                                                    |           | 0.14<br>$3.62 \times 10^{-8}$<br>$-7.85 \times 10^{-2}$<br>0.594                    |
| <b>hole mobility (<math>\mu_h</math>, <math>\text{cm}^2 \text{v}^{-1} \text{s}^{-1}</math>)</b> |                                                                                   |           |                                                                                   |           |                                                                                    |           |                                                                                     |

Figure S4 The main neighboring hole-hopping pathways selected based on the predicted crystal structures for all molecules, along with the reorganization energy  $\lambda$  (eV, green one), centroid-to-centroid distances  $r$  (cm, blue one), transfer integrals  $V$  (eV, orange one) and the hole mobility  $\mu_h$  ( $\text{cm}^2 \text{v}^{-1} \text{s}^{-1}$ , purple one) for main hopping pathways selected based on the predicted crystalline structures.

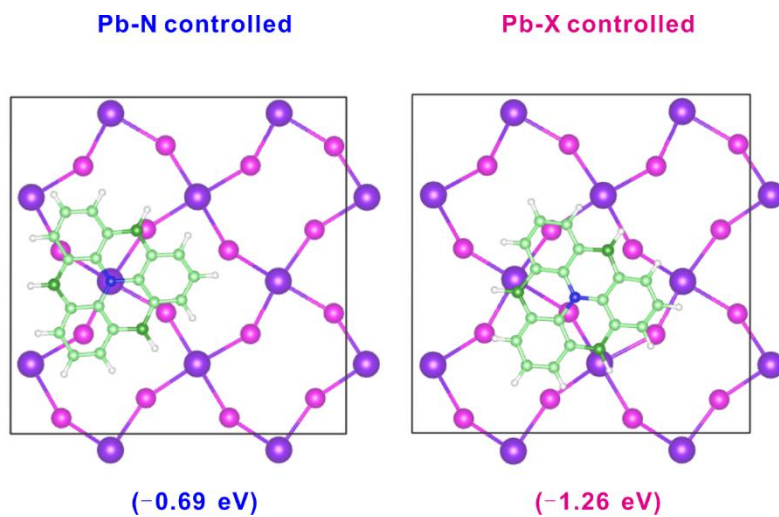

Figure S5 The combination mode of central core and perovskite surface (001 face)

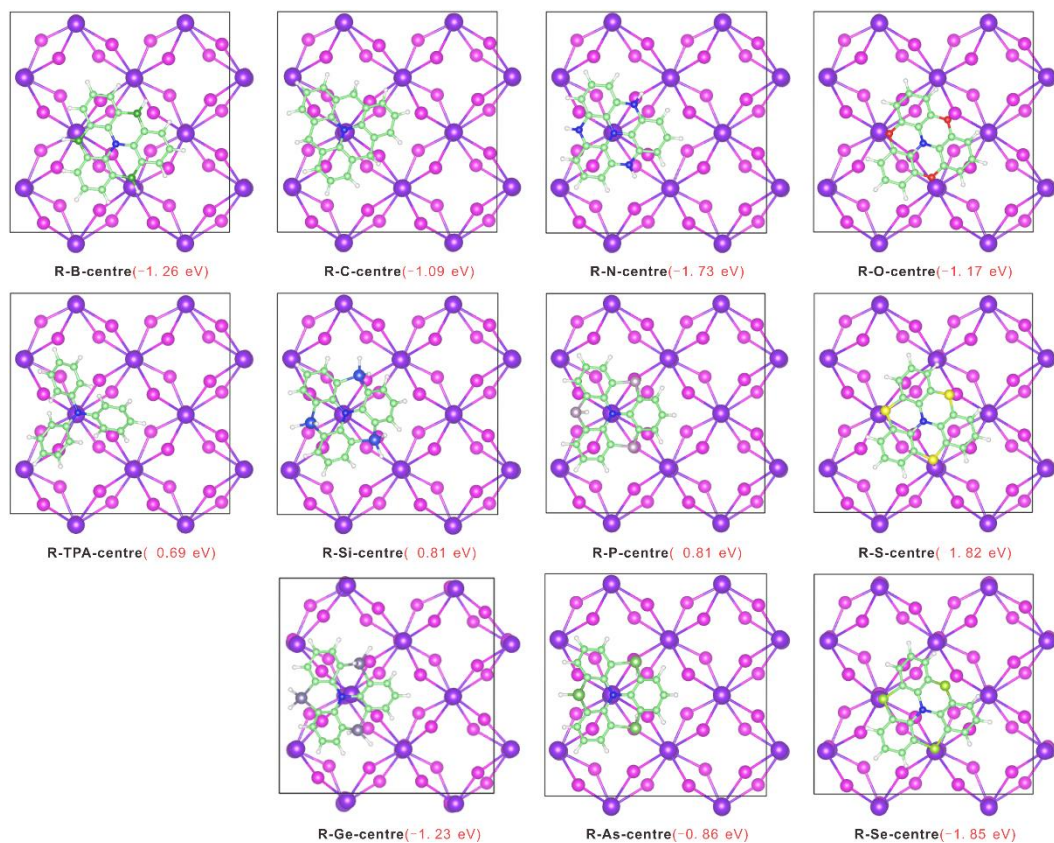

Figure S6 The most stable combination mode of central core and perovskite surface (001 face)

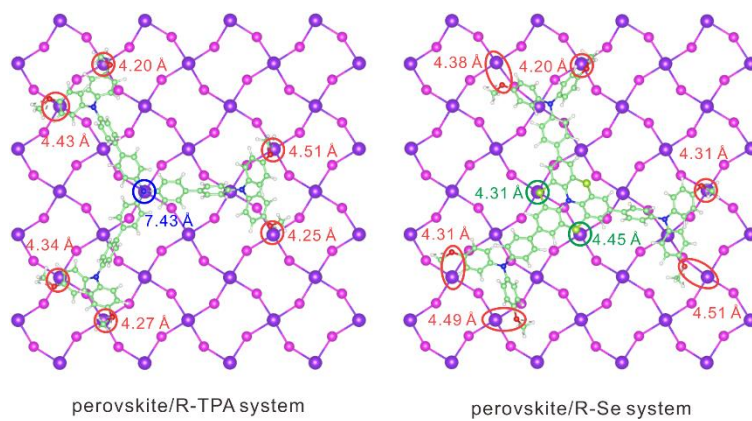

Figure S7 The key bond lengths in perovskite/**R-TPA** and perovskite/**R-Se** systems.

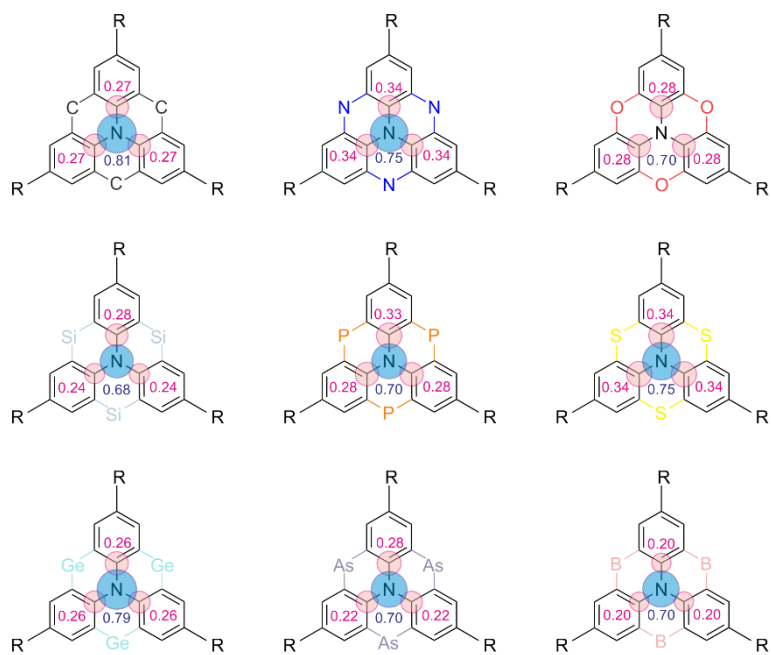

Figure S8 The distribution of partial atomic charges for **R-B**, **R-C**, **R-Si**, **R-Ge**, **R-N**, **R-P**, **R-As**, **R-O**, and **R-S**, where blue represents negative charge and pink represents positive charge.

## References

1. J. Cornil, V. Lemaire, J.-P. Calbert and J.-L. Brédas, *Adv. Mater.*, 2002, **14**, 726-729.
2. R. A. Marcus, *Angew. Chem. Int. Ed.*, 1993, **32**, 1111 - 1222.
3. G. Nan, L. Wang, X. Yang, Z. Shuai and Y. Zhao, *J. Chem. Phys.*, 2009, **130**, 024704.
4. W. Linjun, N. Guangjun, Y. Xiaodi, P. Qian, L. Qikai and S. Zhigang, *Chem. Soc. Rev.*, 2010, **39**, 423-434.
5. S. Grimme, J. Antony, S. Ehrlich and H. Krieg, *J. Chem. Phys.*, 2010, **132**, 154104.
